# Supplementary material
Source: Research Square preprint supplement (doi:10.21203/rs.3.rs-9021977/v1)
Supplement: Supplementary file 1 [file 23d6ef959889f47727946799.docx]

| **Specificity** | **Primers** | **Sequence (5´-3´)** | **Fragment (bp)** | **Author** |
| --- | --- | --- | --- | --- |
| *atpD* gene | atpDPF | GTC GGC GACTTC ACC AAG GGC AAG GTG TTC AAC ACC | 998 | GUO et al., 2008 |
| atpDPR | GTG AAC TGC TTG GCG ACG TGG GTG TTC TGG GAC AGG AA |
| *nec1* gene | Nf | ATG AGC GCG AAC GGA AGC CCC GGA | 720 | BUCKHALID; CHUNG: LORIA,1998 |
| Nr | GCA GGT CGT CAC GAA GGA TCG |
| Operon *txtAB* | TxtAB1 | CCA CCA AGG ACC TGC TCT TC | 385 | WANNER, 2006 |
| TxtAB2 | TCG AGT GGA CCT CAC AGA TG |
| *tomA* gene | Tom3 | GAG GCG TTG GTG GAG TTC TA | 392 | WANNER, 2006 |
| Tom4 | TTG GGG TTG TAC TCC TCG TC |

**Table S2:** List of primers used in this study. Primer sequence, fragment size, and responsible authors included.
